# Supplementary material for: Another Day, Another Currency: Self-interest, Experience, and Attitudes Toward Dollarization in Ecuador
Source: Springer Nature journal article supplement (doi:10.1007/s11109-022-09840-z), 2022-12-19
Supplement: MOESM1 [file 23844694]

# A Online Appendix

## List of Tables

|     |                                                                                                    |      |
|-----|----------------------------------------------------------------------------------------------------|------|
| 1   | Attitudes Toward Dollarization in Ecuador . . . . .                                                | 17   |
| A1  | Summary Statistics . . . . .                                                                       | A-3  |
| A2  | Attitudes Toward Dollarization in Ecuador (Order Probit Models) . . . . .                          | A-4  |
| A3  | Attitudes Toward Dollarization in Ecuador (Sensitivity Checks) . . . . .                           | A-5  |
| A4  | Attitudes Toward Dollarization in Ecuador (Sensitivity Checks) . . . . .                           | A-6  |
| A5  | Attitudes Toward Dollarization in Ecuador (Controlling for Age) . . . . .                          | A-7  |
| A6  | Attitudes Toward Dollarization in Ecuador (Continuous <i>Education</i> Variable) . . . . .         | A-8  |
| A7  | Attitudes Toward Dollarization in Ecuador (Placebo Checks) . . . . .                               | A-9  |
| A8  | Attitudes Toward Dollarization in Ecuador (Control Variables Reported) . . . . .                   | A-10 |
| A9  | Attitudes Toward Dollarization in Ecuador (Controlling for Mother’s Education) . . . . .           | A-11 |
| A10 | Support for Correa and Attitudes Toward Dollarization in Ecuador (Interactive Effects)             | A-12 |
| A11 | Effects of Unemployment Conditional on Experience . . . . .                                        | A-13 |
| A12 | Attitudes Toward Dollarization in Ecuador Conditional on Experience & Political Interest . . . . . | A-14 |

## List of Figures

|    |                                                                                                    |      |
|----|----------------------------------------------------------------------------------------------------|------|
| 1  | Conditional Marginal Effects of Economic Self-Interest (95% Confidence Intervals)                  | 19   |
| 2  | Predicted Support for Dollarization Conditional on Experience (95% Confidence Intervals) . . . . . | 19   |
| 3  | Conditional Marginal Effects of Experience (95% Confidence Intervals) . . . . .                    | 20   |
| 4  | Sensitivity Analysis (95% Confidence Intervals) . . . . .                                          | 22   |
| A1 | Relationship Between Vote Choice and Support for Dollarization (Model 1) . . . . .                 | A-15 |
| A2 | Effects of <i>Unemployed</i> Conditional on Experience (Model A31) . . . . .                       | A-16 |

A3 Marginal Effects of Wealth (Conditional on Experience & Interest in Politics) . . . A-17  
A4 Marginal Effects of Education (Conditional on Experience & Interest in Politics) . A-18

## Summary Statistics

Table A1: Summary Statistics

| <b>Variable</b>        | <b>Mean</b> | <b>Std. Dev.</b> | <b>Min.</b> | <b>Max.</b> | <b>N</b> |
|------------------------|-------------|------------------|-------------|-------------|----------|
| Pro Dollar (Binary)    | 0.725       | 0.447            | 0           | 1           | 1169     |
| Pro Dollar             | 1.764       | 0.801            | 0           | 3           | 1169     |
| Monetary Experience    | 0.506       | 0.5              | 0           | 1           | 1169     |
| Wealth                 | 0.4         | 0.237            | 0           | 1           | 1169     |
| Education              | 0.541       | 0.498            | 0           | 1           | 1169     |
| Age                    | 37.203      | 16.76            | 16          | 96          | 1169     |
| Female                 | 0.476       | 0.5              | 0           | 1           | 1169     |
| Trust Legislature      | 4.05        | 1.795            | 1           | 7           | 1169     |
| National Pride         | 6.746       | 0.842            | 1           | 7           | 1169     |
| Rural                  | 0.342       | 0.475            | 0           | 1           | 1169     |
| Unemployed             | 0.22        | 0.414            | 0           | 1           | 1169     |
| Retired                | 0.041       | 0.199            | 0           | 1           | 1169     |
| Remittances            | 0.06        | 0.237            | 0           | 1           | 1169     |
| Interested in Politics | 2.203       | 0.989            | 1           | 4           | 1169     |
| Vote Correa            | 0.582       | 0.493            | 0           | 1           | 1169     |
| Vote Other             | 0.128       | 0.335            | 0           | 1           | 1169     |
| Left                   | 0.257       | 0.437            | 0           | 1           | 1169     |
| Right                  | 0.257       | 0.437            | 0           | 1           | 1169     |
| Center                 | 0.486       | 0.5              | 0           | 1           | 1169     |
| Mother's Education     | 1.448       | 0.654            | 1           | 3           | 1037     |
| <b>Placebo Checks</b>  |             |                  |             |             |          |
| Prefer State Ownership | 3.637       | 1.793            | 1           | 7           | 1172     |
| Reduce Inequality      | 5.054       | 1.761            | 1           | 7           | 1182     |

## Tables

Table A2: Attitudes Toward Dollarization in Ecuador (Order Probit Models)

|                                 | <i>Dependent Variable: Pro Dollar</i> |                      |                      |
|---------------------------------|---------------------------------------|----------------------|----------------------|
|                                 | (A1)                                  | (A2)                 | (A3)                 |
| Monetary Experience             | -0.281***<br>(0.030)                  | -0.692***<br>(0.128) | -0.390***<br>(0.032) |
| Wealth                          | 0.431*<br>(0.176)                     | -0.078<br>(0.263)    | 0.426*<br>(0.175)    |
| Monetary Experience × Wealth    |                                       | 1.039***<br>(0.256)  |                      |
| Education                       | 0.057<br>(0.043)                      | 0.045<br>(0.040)     | -0.045<br>(0.044)    |
| Monetary Experience × Education |                                       |                      | 0.193***<br>(0.034)  |
| Female                          | -0.094<br>(0.059)                     | -0.112+<br>(0.067)   | -0.094<br>(0.061)    |
| Trust in Legislature            | 0.037<br>(0.030)                      | 0.038<br>(0.029)     | 0.036<br>(0.030)     |
| National Pride                  | 0.060**<br>(0.022)                    | 0.050*<br>(0.021)    | 0.058**<br>(0.022)   |
| Rural                           | 0.132<br>(0.214)                      | 0.164<br>(0.201)     | 0.111<br>(0.227)     |
| Unemployed                      | -0.152*<br>(0.059)                    | -0.161**<br>(0.057)  | -0.141*<br>(0.058)   |
| Retired                         | 0.104<br>(0.146)                      | 0.067<br>(0.154)     | 0.118<br>(0.151)     |
| Remittances                     | -0.307***<br>(0.057)                  | -0.289***<br>(0.062) | -0.309***<br>(0.060) |
| Interested in Politics          | 0.012<br>(0.020)                      | 0.019<br>(0.020)     | 0.013<br>(0.020)     |
| Vote Correa                     | -0.137<br>(0.097)                     | -0.151<br>(0.104)    | -0.126<br>(0.094)    |
| Vote Other                      | 0.043<br>(0.073)                      | 0.030<br>(0.073)     | 0.057<br>(0.072)     |
| Left                            | 0.070+<br>(0.037)                     | 0.057<br>(0.041)     | 0.068+<br>(0.038)    |
| Right                           | 0.135<br>(0.099)                      | 0.149<br>(0.093)     | 0.133<br>(0.100)     |
| $\sigma_1$                      | -0.778**<br>(0.273)                   | -1.028***<br>(0.290) | -0.876**<br>(0.297)  |
| $\sigma_2$                      | -0.040<br>(0.288)                     | -0.286<br>(0.299)    | -0.138<br>(0.312)    |
| $\sigma_3$                      | 1.739***<br>(0.296)                   | 1.505***<br>(0.296)  | 1.643***<br>(0.320)  |
| Party Dummies                   | ✓                                     | ✓                    | ✓                    |
| Region Fixed Effects            | ✓                                     | ✓                    | ✓                    |
| Observations                    | 1169                                  | 1169                 | 1169                 |

**Note:** Ordered probit regression models. Standard errors are clustered by region and shown in parentheses. \*\*\*, \*\*, \* and + indicate statistical significance levels of .1, 1, 5 and 10 percent.

Table A3: Attitudes Toward Dollarization in Ecuador (Sensitivity Checks)

|                                | <i>Dependent Variable: Pro Dollar</i> |                      |                      |                      |
|--------------------------------|---------------------------------------|----------------------|----------------------|----------------------|
|                                | (A4)                                  | (A5)                 | (A6)                 | (A7)                 |
| Wealth                         | -0.184<br>(0.357)                     | -0.162<br>(0.358)    | -0.090<br>(0.320)    | 0.064<br>(0.284)     |
| Experience (Age ≥ 31)          | -0.813***<br>(0.198)                  |                      |                      |                      |
| Experience (Age ≥ 31) × Wealth | 1.084**<br>(0.360)                    |                      |                      |                      |
| Experience (Age ≥ 32)          |                                       | -0.802***<br>(0.183) |                      |                      |
| Experience (Age ≥ 32) × Wealth |                                       | 1.090**<br>(0.362)   |                      |                      |
| Experience (Age ≥ 33)          |                                       |                      | -0.780***<br>(0.162) |                      |
| Experience (Age ≥ 33) × Wealth |                                       |                      | 0.971**<br>(0.302)   |                      |
| Experience (Age ≥ 34)          |                                       |                      |                      | -0.654***<br>(0.170) |
| Experience (Age ≥ 34) × Wealth |                                       |                      |                      | 0.739*<br>(0.290)    |
| Controls                       | ✓                                     | ✓                    | ✓                    | ✓                    |
| Party Dummies                  | ✓                                     | ✓                    | ✓                    | ✓                    |
| Region Fixed Effects           | ✓                                     | ✓                    | ✓                    | ✓                    |
| Observations                   | 1169                                  | 1169                 | 1169                 | 1169                 |

**Note:** Probit regression models. Standard errors are clustered by region and shown in parentheses. \*\*\*, \*\*, \* and + indicate statistical significance levels of .1, 1, 5 and 10 percent.

Table A4: Attitudes Toward Dollarization in Ecuador (Sensitivity Checks)

|                                   | <i>Dependent Variable: Pro Dollar</i> |                      |                      |                      |
|-----------------------------------|---------------------------------------|----------------------|----------------------|----------------------|
|                                   | (A8)                                  | (A9)                 | (A10)                | (A11)                |
| Experience (Age ≥ 31)             | -0.541***<br>(0.087)                  |                      |                      |                      |
| Education                         | -0.037<br>(0.075)                     | -0.017<br>(0.065)    | -0.025<br>(0.065)    | 0.031<br>(0.057)     |
| Experience (Age ≥ 31) × Education | 0.256**<br>(0.091)                    |                      |                      |                      |
| Experience (Age ≥ 32)             |                                       | -0.510***<br>(0.071) |                      |                      |
| Experience (Age ≥ 32) × Education |                                       | 0.223**<br>(0.077)   |                      |                      |
| Experience (Age ≥ 33)             |                                       |                      | -0.538***<br>(0.078) |                      |
| Experience (Age ≥ 33) × Education |                                       |                      | 0.232**<br>(0.075)   |                      |
| Experience (Age ≥ 34)             |                                       |                      |                      | -0.460***<br>(0.059) |
| Experience (Age ≥ 34) × Education |                                       |                      |                      | 0.161*<br>(0.068)    |
| Controls                          | ✓                                     | ✓                    | ✓                    | ✓                    |
| Party Dummies                     | ✓                                     | ✓                    | ✓                    | ✓                    |
| Region Fixed Effects              | ✓                                     | ✓                    | ✓                    | ✓                    |
| Observations                      | 1169                                  | 1169                 | 1169                 | 1169                 |

**Note:** Probit regression models. Standard errors are clustered by region and shown in parentheses. \*\*\*, \*\*, \* and + indicate statistical significance levels of .1, 1, 5 and 10 percent.

Table A5: Attitudes Toward Dollarization in Ecuador (Controlling for Age)

|                                 | <i>Dependent Variable: Pro Dollar</i> |                                |                                |
|---------------------------------|---------------------------------------|--------------------------------|--------------------------------|
|                                 | (A12)                                 | (A13)                          | (A14)                          |
| Monetary Experience             | -0.200 <sup>+</sup><br>(0.112)        | -0.484**<br>(0.187)            | -0.282*<br>(0.134)             |
| Wealth                          | 0.428*<br>(0.182)                     | 0.054<br>(0.284)               | 0.427*<br>(0.183)              |
| Monetary Experience × Wealth    |                                       | 0.721*<br>(0.283)              |                                |
| Education                       | 0.109**<br>(0.038)                    | 0.103**<br>(0.037)             | 0.038<br>(0.059)               |
| Monetary Experience × Education |                                       |                                | 0.127 <sup>+</sup><br>(0.077)  |
| Age                             | -0.007 <sup>+</sup><br>(0.004)        | -0.007 <sup>+</sup><br>(0.004) | -0.006<br>(0.004)              |
| Female                          | -0.093<br>(0.091)                     | -0.105<br>(0.092)              | -0.092<br>(0.092)              |
| Trust in Legislature            | 0.062 <sup>+</sup><br>(0.033)         | 0.064*<br>(0.032)              | 0.062 <sup>+</sup><br>(0.033)  |
| National Pride                  | 0.054 <sup>+</sup><br>(0.029)         | 0.048 <sup>+</sup><br>(0.029)  | 0.054 <sup>+</sup><br>(0.030)  |
| Rural                           | 0.063<br>(0.060)                      | 0.089<br>(0.059)               | 0.048<br>(0.058)               |
| Unemployed                      | -0.203 <sup>+</sup><br>(0.120)        | -0.210 <sup>+</sup><br>(0.116) | -0.196 <sup>+</sup><br>(0.117) |
| Retired                         | 0.304*<br>(0.138)                     | 0.272 <sup>+</sup><br>(0.147)  | 0.305*<br>(0.141)              |
| Remittances                     | -0.501***<br>(0.041)                  | -0.487***<br>(0.042)           | -0.502***<br>(0.041)           |
| Interested in Politics          | -0.022<br>(0.049)                     | -0.018<br>(0.050)              | -0.022<br>(0.049)              |
| Vote Correa                     | -0.043<br>(0.082)                     | -0.054<br>(0.083)              | -0.037<br>(0.081)              |
| Vote Other                      | 0.095<br>(0.077)                      | 0.081<br>(0.078)               | 0.103<br>(0.077)               |
| Left                            | 0.010<br>(0.097)                      | 0.001<br>(0.101)               | 0.008<br>(0.097)               |
| Right                           | 0.001<br>(0.111)                      | 0.008<br>(0.106)               | -0.002<br>(0.112)              |
| Party Dummies                   | ✓                                     | ✓                              | ✓                              |
| Region Fixed Effects            | ✓                                     | ✓                              | ✓                              |
| Observations                    | 1169                                  | 1169                           | 1169                           |

**Note:** Probit regression models. Standard errors are clustered by region and shown in parentheses. \*\*\*, \*\*, \* and <sup>+</sup> indicate statistical significance levels of .1, 1, 5 and 10 percent.

Table A6: Attitudes Toward Dollarization in Ecuador (Continuous *Education* Variable)

|                                          | <i>Dependent Variable: Pro Dollar</i> |                      |                      |                      |
|------------------------------------------|---------------------------------------|----------------------|----------------------|----------------------|
|                                          | (A15)                                 | (A16)                | (A17)                | (A18)                |
| Monetary Experience                      | -0.309***<br>(0.052)                  | -0.365**<br>(0.114)  | -0.214***<br>(0.032) | -0.543***<br>(0.097) |
| Years of Education                       | 0.034***<br>(0.003)                   | 0.030***<br>(0.007)  | 0.029***<br>(0.005)  | 0.010<br>(0.006)     |
| Monetary Experience × Years of Education |                                       | 0.005<br>(0.007)     |                      | 0.028***<br>(0.007)  |
| Wealth                                   | 0.284<br>(0.177)                      | 0.287<br>(0.176)     | 0.257<br>(0.185)     | 0.278<br>(0.182)     |
| Female                                   | -0.129<br>(0.088)                     | -0.129<br>(0.088)    | -0.120*<br>(0.056)   | -0.120*<br>(0.058)   |
| Trust in Legislature                     | 0.069*<br>(0.030)                     | 0.069*<br>(0.030)    | 0.042<br>(0.030)     | 0.042<br>(0.029)     |
| National Pride                           | 0.051*<br>(0.025)                     | 0.050*<br>(0.026)    | 0.046+<br>(0.024)    | 0.043+<br>(0.024)    |
| Rural                                    | -0.043<br>(0.114)                     | -0.046<br>(0.112)    | 0.088<br>(0.192)     | 0.075<br>(0.191)     |
| Unemployed                               | -0.192<br>(0.136)                     | -0.191<br>(0.136)    | -0.140*<br>(0.067)   | -0.134+<br>(0.068)   |
| Retired                                  | 0.227<br>(0.189)                      | 0.228<br>(0.189)     | 0.123<br>(0.139)     | 0.125<br>(0.141)     |
| Remittances                              | -0.487***<br>(0.043)                  | -0.488***<br>(0.043) | -0.303***<br>(0.052) | -0.310***<br>(0.056) |
| Interest in Politics                     | -0.028<br>(0.054)                     | -0.027<br>(0.054)    | 0.005<br>(0.023)     | 0.007<br>(0.023)     |
| Vote Correa                              | -0.077<br>(0.100)                     | -0.077<br>(0.100)    | -0.159<br>(0.102)    | -0.154<br>(0.102)    |
| Vote Other                               | 0.049<br>(0.076)                      | 0.050<br>(0.076)     | 0.005<br>(0.074)     | 0.016<br>(0.073)     |
| Left                                     | 0.016<br>(0.105)                      | 0.015<br>(0.105)     | 0.076<br>(0.049)     | 0.075<br>(0.047)     |
| Right                                    | 0.026<br>(0.121)                      | 0.027<br>(0.122)     | 0.167+<br>(0.090)    | 0.171+<br>(0.091)    |
| $\sigma_1$                               |                                       |                      | -0.681**<br>(0.243)  | -0.948***<br>(0.276) |
| $\sigma_2$                               |                                       |                      | 0.074<br>(0.242)     | -0.192<br>(0.283)    |
| $\sigma_3$                               |                                       |                      | 1.854***<br>(0.240)  | 1.589***<br>(0.285)  |
| Party Dummies                            | ✓                                     | ✓                    | ✓                    | ✓                    |
| Region Fixed Effects                     | ✓                                     | ✓                    | ✓                    | ✓                    |
| Observations                             | 1141                                  | 1141                 | 1141                 | 1141                 |

**Note:** Models A15 and A16 are probit regression models. Models A17 and A18 are ordered probit regression models. Standard errors are clustered by country and shown in parentheses. \*\*\*, \*\*, \* and + indicate statistical significance levels of .1, 1, 5 and 10 percent, respectively.



Table A7: Attitudes Toward Dollarization in Ecuador (Placebo Checks)

| <i>Dependent Variable:</i>      | <i>Prefer State Ownership</i>   |                                 | <i>Reduce Inequality</i>        |                                 |
|---------------------------------|---------------------------------|---------------------------------|---------------------------------|---------------------------------|
|                                 | (A19)                           | (A20)                           | (A21)                           | (A22)                           |
| Monetary Experience             | -0.394<br>(0.227)               | -0.170<br>(0.258)               | -0.115<br>(0.269)               | -0.212<br>(0.277)               |
| Wealth                          | -0.191<br>(0.521)               | -0.114<br>(0.485)               | 0.076<br>(0.272)                | -0.161<br>(0.240)               |
| Monetary Experience × Wealth    | 0.140<br>(0.426)                |                                 | -0.496<br>(0.314)               |                                 |
| Education                       | -0.222 <sup>+</sup><br>(0.097)  | -0.063<br>(0.195)               | -0.018<br>(0.054)               | 0.068<br>(0.155)                |
| Monetary Experience × Education |                                 | -0.297<br>(0.193)               |                                 | -0.173<br>(0.227)               |
| Female                          | -0.067<br>(0.055)               | -0.064<br>(0.054)               | 0.021<br>(0.103)                | 0.013<br>(0.108)                |
| Trust in Legislature            | 0.244 <sup>***</sup><br>(0.026) | 0.245 <sup>***</sup><br>(0.027) | 0.154 <sup>**</sup><br>(0.032)  | 0.155 <sup>**</sup><br>(0.031)  |
| National Pride                  | 0.035<br>(0.137)                | 0.039<br>(0.135)                | 0.283 <sup>***</sup><br>(0.031) | 0.280 <sup>***</sup><br>(0.031) |
| Rural                           | 0.021<br>(0.339)                | 0.049<br>(0.316)                | -0.789<br>(0.447)               | -0.756<br>(0.432)               |
| Unemployed                      | -0.178<br>(0.118)               | -0.193<br>(0.107)               | -0.157<br>(0.109)               | -0.171<br>(0.100)               |
| Retired                         | -0.040<br>(0.259)               | -0.057<br>(0.275)               | 0.129<br>(0.169)                | 0.099<br>(0.188)                |
| Remittances                     | 0.254 <sup>+</sup><br>(0.115)   | 0.254 <sup>+</sup><br>(0.117)   | 0.155<br>(0.101)                | 0.168<br>(0.093)                |
| Interest in Politics            | 0.045<br>(0.038)                | 0.042<br>(0.036)                | 0.163<br>(0.119)                | 0.166<br>(0.119)                |
| Vote Correa                     | 0.174 <sup>+</sup><br>(0.076)   | 0.160<br>(0.089)                | 0.129<br>(0.134)                | 0.113<br>(0.144)                |
| Vote Other                      | -0.327 <sup>+</sup><br>(0.141)  | -0.347 <sup>+</sup><br>(0.145)  | -0.217 <sup>+</sup><br>(0.100)  | -0.235 <sup>+</sup><br>(0.094)  |
| Left                            | -0.106<br>(0.135)               | -0.102<br>(0.138)               | 0.102 <sup>+</sup><br>(0.049)   | 0.098<br>(0.050)                |
| Right                           | 0.053<br>(0.107)                | 0.052<br>(0.114)                | -0.098<br>(0.063)               | -0.090<br>(0.066)               |
| Party Dummies                   | ✓                               | ✓                               | ✓                               | ✓                               |
| Region Fixed Effects            | ✓                               | ✓                               | ✓                               | ✓                               |
| Observations                    | 1172                            | 1172                            | 1182                            | 1182                            |

**Note:** Standard errors are clustered by country and shown in parentheses. \*\*\*, \*\*, \* and <sup>+</sup> indicate statistical significance levels of .1, 1, 5 and 10 percent, respectively.

<sup>a</sup>Attitudes about privatization are measured with a 7-point Likert item: “The Ecuadorian government should implement strong policies to reduce income inequality between the rich and the poor.” For *Reduce Inequality*, we use the following Likert item as a dependent variable: “The Ecuadorian government should implement strong policies to reduce income inequality between the rich and the poor.”

Table A8: Attitudes Toward Dollarization in Ecuador (Control Variables Reported)

|                                 | <i>Dependent Variable: Pro Dollar</i> |                      |                      |
|---------------------------------|---------------------------------------|----------------------|----------------------|
|                                 | (A23)                                 | (A24)                | (A25)                |
| Monetary Experience             | -0.371***<br>(0.047)                  | -0.654***<br>(0.170) | -0.460***<br>(0.059) |
| Wealth                          | 0.448*<br>(0.178)                     | 0.064<br>(0.284)     | 0.445*<br>(0.180)    |
| Monetary Experience × Wealth    |                                       | 0.739*<br>(0.290)    |                      |
| Education                       | 0.120**<br>(0.038)                    | 0.114**<br>(0.036)   | 0.031<br>(0.057)     |
| Monetary Experience × Education |                                       |                      | 0.161*<br>(0.068)    |
| Female                          | -0.090<br>(0.090)                     | -0.103<br>(0.092)    | -0.090<br>(0.092)    |
| Trust in Legislature            | 0.064*<br>(0.032)                     | 0.066*<br>(0.031)    | 0.064*<br>(0.032)    |
| National Pride                  | 0.060*<br>(0.028)                     | 0.053+<br>(0.028)    | 0.059*<br>(0.029)    |
| Rural                           | 0.080<br>(0.056)                      | 0.106*<br>(0.052)    | 0.060<br>(0.058)     |
| Unemployed                      | -0.205+<br>(0.118)                    | -0.212+<br>(0.114)   | -0.196+<br>(0.116)   |
| Retired                         | 0.182<br>(0.203)                      | 0.155<br>(0.211)     | 0.194<br>(0.206)     |
| Remittances                     | -0.490***<br>(0.047)                  | -0.476***<br>(0.049) | -0.491***<br>(0.046) |
| Interest in Politics            | -0.022<br>(0.049)                     | -0.018<br>(0.050)    | -0.022<br>(0.049)    |
| Vote Correa                     | -0.063<br>(0.086)                     | -0.074<br>(0.087)    | -0.055<br>(0.084)    |
| Vote Other                      | 0.078<br>(0.078)                      | 0.065<br>(0.079)     | 0.090<br>(0.077)     |
| Left                            | 0.009<br>(0.097)                      | 0.000<br>(0.102)     | 0.006<br>(0.098)     |
| Right                           | -0.013<br>(0.120)                     | -0.005<br>(0.115)    | -0.015<br>(0.122)    |
| Party Dummies                   | ✓                                     | ✓                    | ✓                    |
| Region Fixed Effects            | ✓                                     | ✓                    | ✓                    |
| Observations                    | 1169                                  | 1169                 | 1169                 |

**Note:** These are the estimates from Table 1 but with control variables reported. Standard errors are clustered by region and shown in parentheses. \*\*\*, \*\*, \* and + indicate statistical significance levels of .1, 1, 5 and 10 percent.

Table A9: Attitudes Toward Dollarization in Ecuador (Controlling for Mother's Education)

|                                 | <i>Dependent Variable: Pro Dollar</i> |                      |                      |
|---------------------------------|---------------------------------------|----------------------|----------------------|
|                                 | (A26)                                 | (A27)                | (A28)                |
| Monetary Experience             | -0.361***<br>(0.038)                  | -0.689***<br>(0.171) | -0.477***<br>(0.071) |
| Mother's Education              | 0.020<br>(0.040)                      | 0.056<br>(0.047)     | 0.020<br>(0.043)     |
| Wealth                          | 0.485**<br>(0.151)                    | 0.036<br>(0.257)     | 0.482**<br>(0.153)   |
| Monetary Experience × Wealth    |                                       | 0.851**<br>(0.308)   |                      |
| Education                       | 0.097*<br>(0.049)                     | 0.083+<br>(0.043)    | -0.014<br>(0.099)    |
| Monetary Experience × Education |                                       |                      | 0.199<br>(0.124)     |
| Female                          | -0.118<br>(0.077)                     | -0.130<br>(0.080)    | -0.120<br>(0.078)    |
| Trust in Legislature            | 0.055<br>(0.034)                      | 0.055+<br>(0.033)    | 0.053<br>(0.033)     |
| National Pride                  | 0.051***<br>(0.010)                   | 0.046***<br>(0.011)  | 0.050***<br>(0.012)  |
| Rural                           | 0.018<br>(0.117)                      | 0.057<br>(0.103)     | -0.010<br>(0.126)    |
| Unemployed                      | -0.242*<br>(0.117)                    | -0.252*<br>(0.109)   | -0.233*<br>(0.113)   |
| Retired                         | 0.060<br>(0.204)                      | 0.033<br>(0.208)     | 0.075<br>(0.206)     |
| Remittances                     | -0.446***<br>(0.020)                  | -0.426***<br>(0.018) | -0.448***<br>(0.022) |
| Interest in Politics            | -0.038<br>(0.039)                     | -0.034<br>(0.041)    | -0.037<br>(0.040)    |
| Vote Correa                     | 0.002<br>(0.078)                      | -0.009<br>(0.078)    | 0.012<br>(0.079)     |
| Vote Other                      | 0.037<br>(0.096)                      | 0.019<br>(0.096)     | 0.051<br>(0.099)     |
| Left                            | 0.060<br>(0.110)                      | 0.056<br>(0.113)     | 0.058<br>(0.110)     |
| Right                           | 0.031<br>(0.118)                      | 0.046<br>(0.107)     | 0.032<br>(0.120)     |
| Party Dummies                   | ✓                                     | ✓                    | ✓                    |
| Region Fixed Effects            | ✓                                     | ✓                    | ✓                    |
| Observations                    | 1037                                  | 1037                 | 1037                 |

**Note:** Probit regression models. Standard errors are clustered by region and shown in parentheses. \*\*\*, \*\*, \* and + indicate statistical significance levels of .1, 1, 5 and 10 percent.

Table A10: Support for Correa and Attitudes Toward Dollarization in Ecuador (Interactive Effects)

|                         | <i>Dependent Variable: Pro Dollar</i> |                      |
|-------------------------|---------------------------------------|----------------------|
|                         | (A29)                                 | (A30)                |
| Vote Correa             | -0.030<br>(0.122)                     | -0.104<br>(0.101)    |
| Wealth                  | 0.500***<br>(0.124)                   | 0.444*<br>(0.178)    |
| Vote Correa × Wealth    | -0.087<br>(0.218)                     |                      |
| Education               | 0.121**<br>(0.040)                    | 0.073<br>(0.101)     |
| Vote Correa × Education |                                       | 0.081<br>(0.110)     |
| Monetary Experience     | -0.370***<br>(0.047)                  | -0.369***<br>(0.050) |
| Female                  | -0.090<br>(0.091)                     | -0.090<br>(0.090)    |
| Trust in Legislature    | 0.064*<br>(0.032)                     | 0.064*<br>(0.032)    |
| National Pride          | 0.060*<br>(0.029)                     | 0.058+<br>(0.030)    |
| Rural                   | 0.079<br>(0.056)                      | 0.073<br>(0.060)     |
| Unemployed              | -0.204+<br>(0.119)                    | -0.203+<br>(0.117)   |
| Retired                 | 0.184<br>(0.202)                      | 0.186<br>(0.200)     |
| Remittances             | -0.492***<br>(0.046)                  | -0.488***<br>(0.050) |
| Interest in Politics    | -0.022<br>(0.049)                     | -0.023<br>(0.048)    |
| Vote Other              | 0.078<br>(0.078)                      | 0.084<br>(0.081)     |
| Left                    | 0.010<br>(0.097)                      | 0.007<br>(0.097)     |
| Right                   | -0.014<br>(0.121)                     | -0.013<br>(0.120)    |
| Party Dummies           | ✓                                     | ✓                    |
| Region Fixed Effects    | ✓                                     | ✓                    |
| Observations            | 1169                                  | 1169                 |

**Note:** Probit regression models. Standard errors are clustered by region and shown in parentheses. \*\*\*, \*\*, \* and + indicate statistical significance levels of .1, 1, 5 and 10 percent.

Table A11: Effects of Unemployment Conditional on Experience

|                                  | <i>Dependent Variable:</i><br><i>Pro Dollar</i><br>(A31) |
|----------------------------------|----------------------------------------------------------|
| Monetary Experience              | -0.435***<br>(0.069)                                     |
| Unemployed                       | -0.337*<br>(0.150)                                       |
| Monetary Experience × Unemployed | 0.268*<br>(0.121)                                        |
| Wealth                           | 0.442*<br>(0.180)                                        |
| Education                        | 0.133**<br>(0.042)                                       |
| Female                           | -0.086<br>(0.090)                                        |
| Trust in Legislature             | 0.065*<br>(0.033)                                        |
| National Pride                   | 0.061*<br>(0.027)                                        |
| Rural                            | 0.069<br>(0.055)                                         |
| Retired                          | 0.214<br>(0.210)                                         |
| Remittances                      | -0.489***<br>(0.042)                                     |
| Interest in Politics             | -0.026<br>(0.049)                                        |
| Vote Correa                      | -0.064<br>(0.087)                                        |
| Vote Other                       | 0.084<br>(0.078)                                         |
| Left                             | 0.007<br>(0.098)                                         |
| Right                            | -0.014<br>(0.117)                                        |
| Party Dummies                    | ✓                                                        |
| Region Fixed Effects             | ✓                                                        |
| Observations                     | 1169                                                     |

**Note:** Probit regression models. Standard errors are clustered by region and shown in parentheses. \*\*\*, \*\*, \* and + indicate statistical significance levels of .1, 1, 5 and 10 percent.

Table A12: Attitudes Toward Dollarization in Ecuador Conditional on Experience & Political Interest

|                                                        | (A32)               | (A33)              |
|--------------------------------------------------------|---------------------|--------------------|
| Monetary Experience                                    | -1.205*             | -1.007***          |
|                                                        | (0.503)             | (0.302)            |
| Wealth                                                 | 0.781               | 0.487*             |
|                                                        | (0.888)             | (0.209)            |
| Monetary Experience × Wealth                           | 1.319 <sup>+</sup>  |                    |
|                                                        | (0.686)             |                    |
| Interest in Politics                                   | 0.011               | -0.118             |
|                                                        | (0.224)             | (0.111)            |
| Monetary Experience × Interest in Politics             | 0.282               | 0.261*             |
|                                                        | (0.208)             | (0.131)            |
| Wealth × Interest in Politics                          | -0.272              |                    |
|                                                        | (0.318)             |                    |
| Monetary Experience × Wealth × Interest in Politics    | -0.353              |                    |
|                                                        | (0.231)             |                    |
| Education                                              | 0.123***            | 0.031              |
|                                                        | (0.032)             | (0.172)            |
| Monetary Experience × Education                        |                     | 0.590**            |
|                                                        |                     | (0.194)            |
| Education × Interest in Politics                       |                     | 0.003              |
|                                                        |                     | (0.085)            |
| Monetary Experience × Education × Interest in Politics |                     | -0.220*            |
|                                                        |                     | (0.106)            |
| Female                                                 | -0.098              | -0.068             |
|                                                        | (0.078)             | (0.089)            |
| Trust in Legislature                                   | 0.064 <sup>+</sup>  | 0.062 <sup>+</sup> |
|                                                        | (0.035)             | (0.032)            |
| National Pride                                         | 0.062*              | 0.060*             |
|                                                        | (0.026)             | (0.029)            |
| Rural                                                  | 0.112 <sup>+</sup>  | 0.074              |
|                                                        | (0.060)             | (0.065)            |
| Unemployed                                             | -0.227 <sup>+</sup> | -0.202             |
|                                                        | (0.123)             | (0.128)            |
| Retired                                                | 0.158               | 0.199              |
|                                                        | (0.223)             | (0.220)            |
| Remittances                                            | -0.508***           | -0.497***          |
|                                                        | (0.055)             | (0.048)            |
| Vote Correa                                            | -0.066              | -0.051             |
|                                                        | (0.085)             | (0.076)            |
| Vote Other                                             | 0.088               | 0.104              |
|                                                        | (0.081)             | (0.074)            |
| Left                                                   | 0.006               | -0.002             |
|                                                        | (0.092)             | (0.096)            |
| Right                                                  | -0.013              | -0.020             |
|                                                        | (0.114)             | (0.126)            |
| Party Dummies                                          | ✓                   | ✓                  |
| Region Fixed Effects                                   | ✓                   | ✓                  |
| Observations                                           | 1169                | 1169               |

**Note:** Probit regression models. Standard errors are clustered by region and shown in parentheses. \*\*\*, \*\*, \* and <sup>+</sup> indicate statistical significance levels of .1, 1, 5 and 10 percent. These results are presented graphically in **Figure A3** and **Figure A4**.

**Figures**

Figure A1: Relationship Between Vote Choice and Support for Dollarization (Model 1)

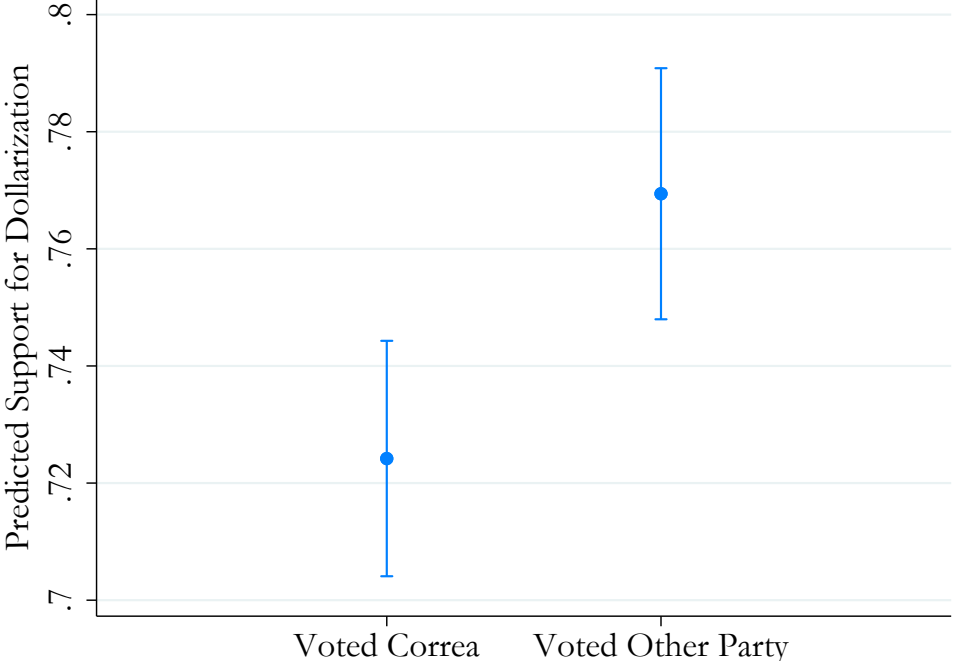

**Note:** All other covariates held at their mean.

Figure A2: Effects of *Unemployed* Conditional on Experience (Model A31)

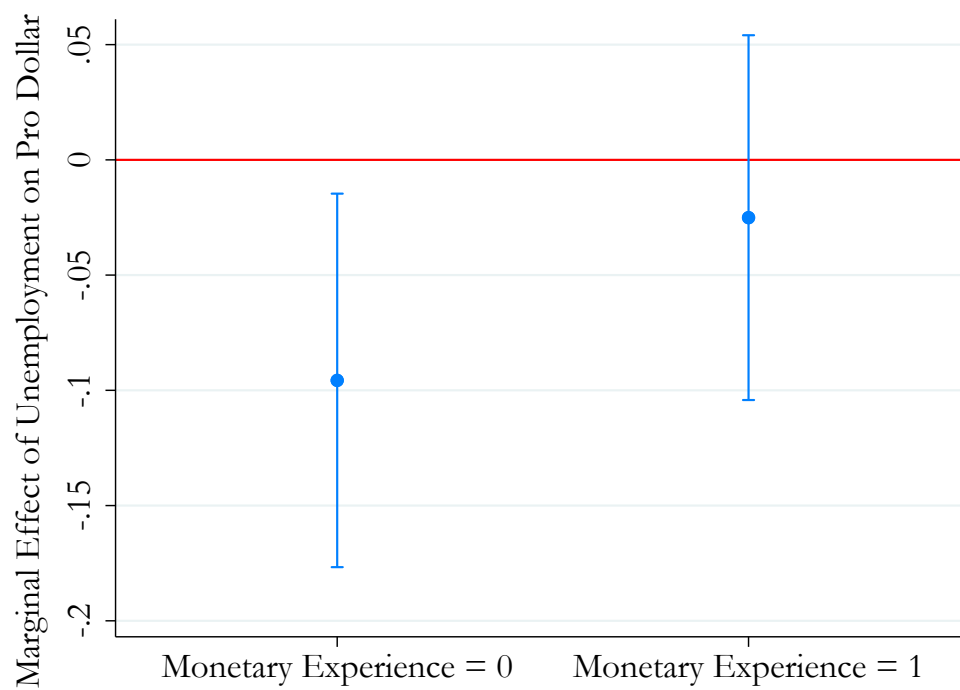

**Note:** All other covariates held at their mean.



Figure A3: Marginal Effects of Wealth (Conditional on Experience & Interest in Politics)

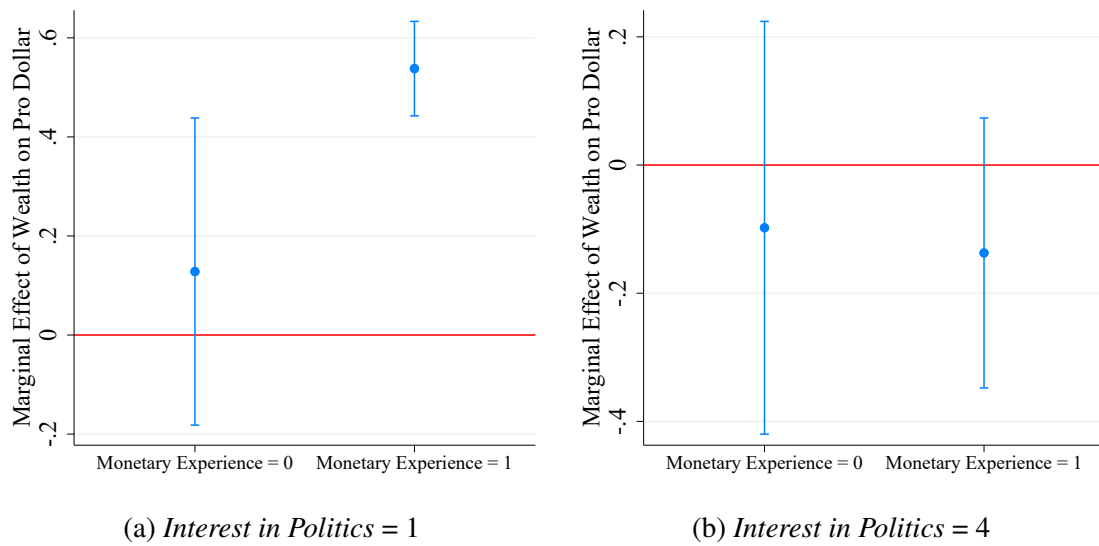

**Note:** Complete estimates are shown in **Table A12**. All other covariates held at their mean.

Figure A4: Marginal Effects of Education (Conditional on Experience & Interest in Politics)

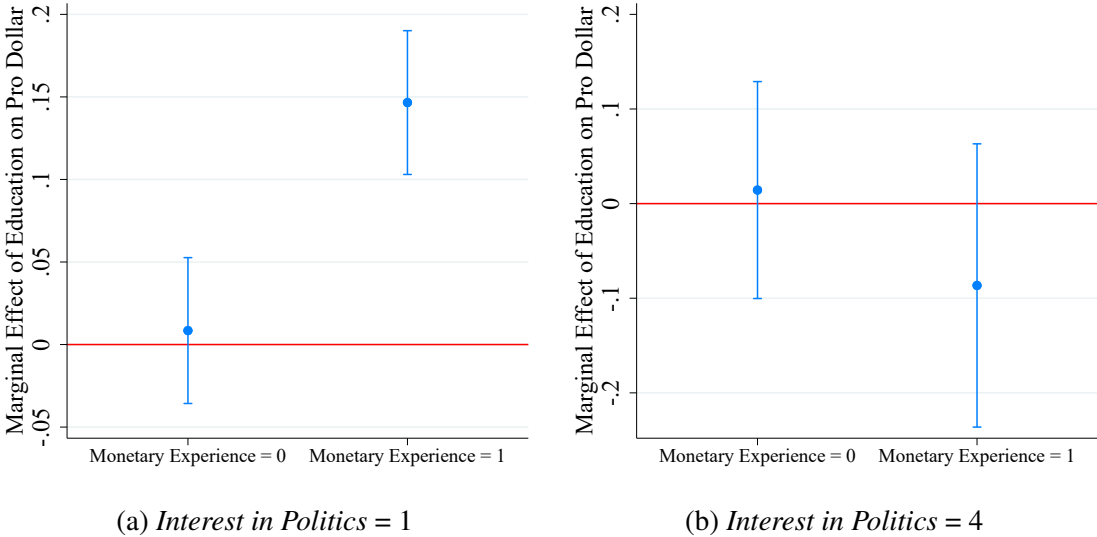

**Note:** Complete estimates are shown in **Table A12**. All other covariates held at their mean.
